# Supplementary material
Source: PubMed Central journal article supplement (PMC6937586)

Additional Figure 1.

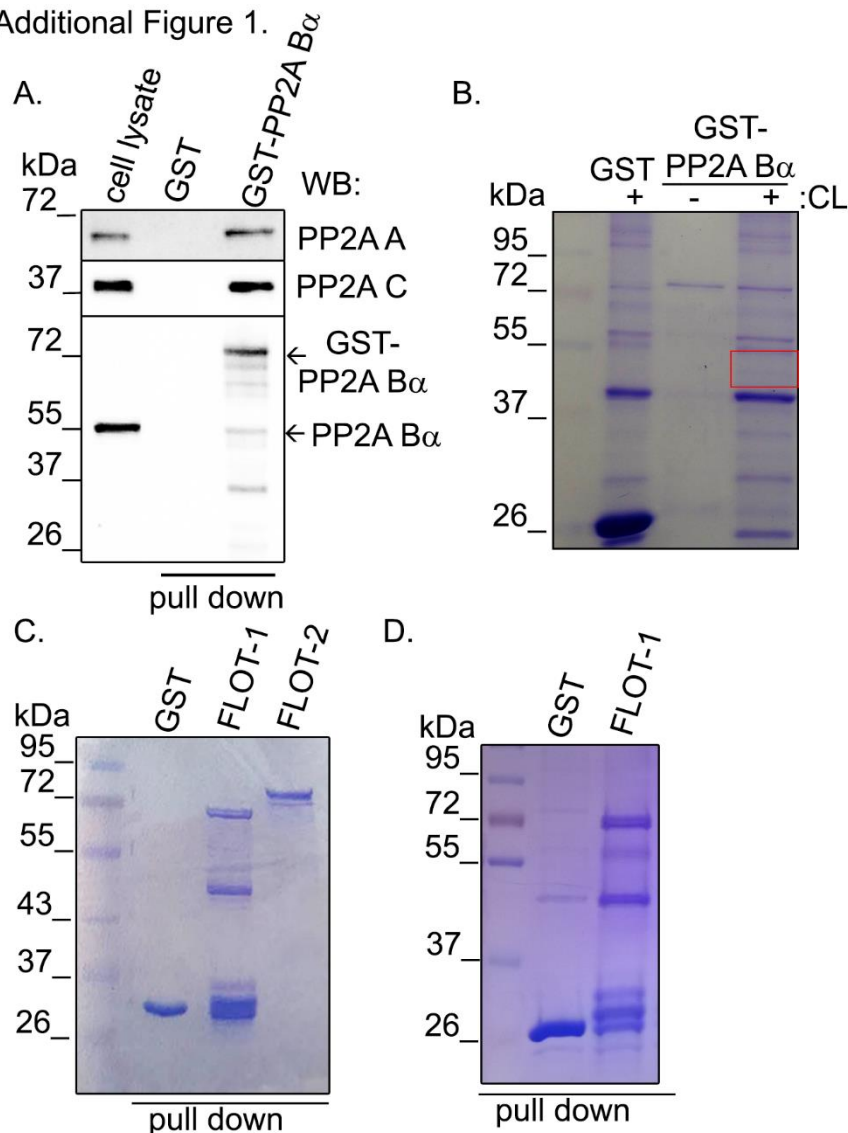

**Additional figure 1. Internal controls of the interaction between PP2A B $\alpha$  and flotillin proteins** A) Western blot analysis of endothelial cell lysate and pull down samples of GST and GST- PP2A B $\alpha$ . B) Bacterially expressed GST and GST-tagged PP2A B $\alpha$  were loaded onto glutathione-Sepharose. After washing steps the resin samples were incubated with BPAEC lysate (CL) or cell lysis buffer . The bound proteins were eluted by boiling the samples in 2x SDS sample buffer. Blue silver staining of the eluted fractions after the pull-down are shown. Red box shows the band of a possible interacting protein appearing only in the GST-tagged PP2A B $\alpha$  sample incubated with EC cell lysate. That band was cut from the gel and was identified by LC-MS/MS as flotillin-1 which was confirmed by Western blot (Fig 1A). C-D) Coomassie Blue staining of the pull down samples (corresponding to Fig 1B and Fig 1D, respectively) shows the efficiency of purification and the presence of GST-tagged recombinant proteins.

Additional Figure 2.

A.

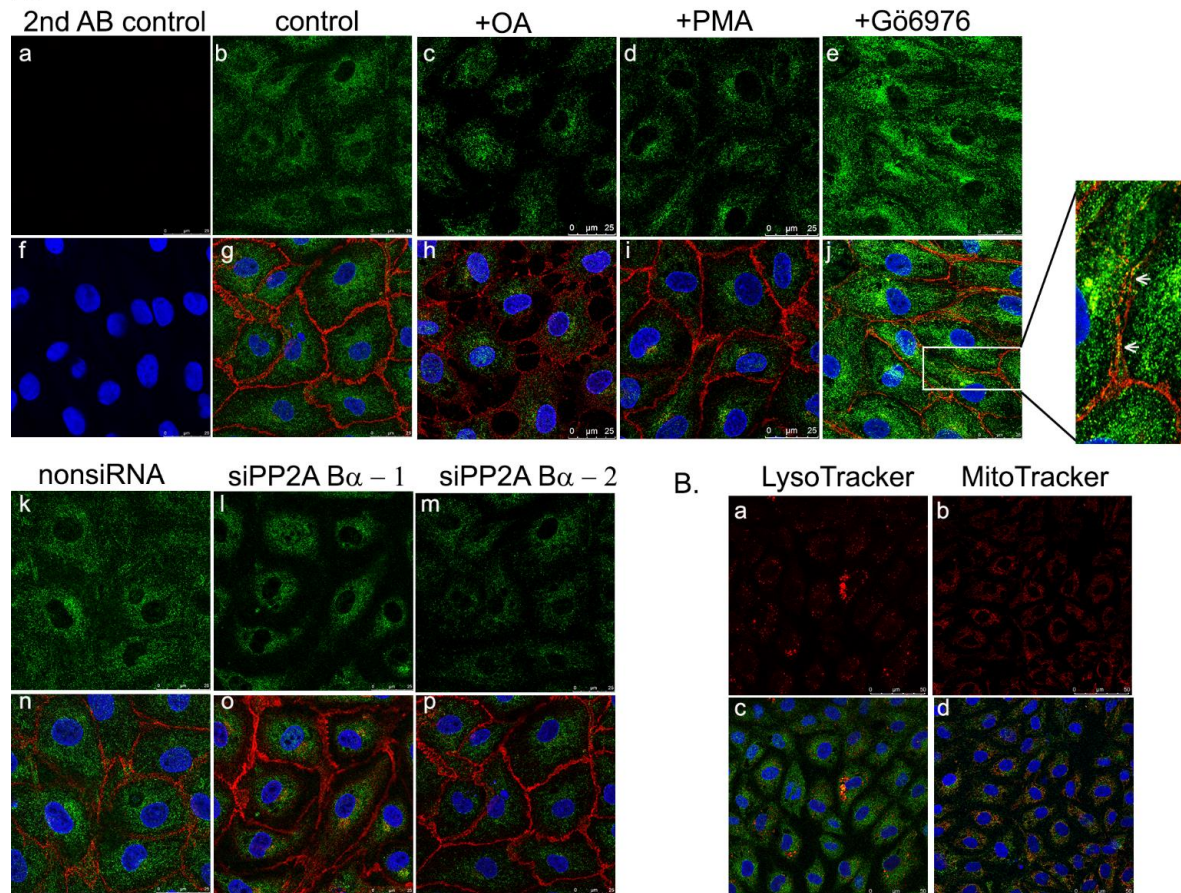

**Additional figure 2. Localization of flotillin-1 in endothelial cells.** A) Immunofluorescence staining of BPAEC using flotillin-1 (green) and VE-cadherin (red). Zoomed section (marked by white rectangle) on merged image “j” show flotillin-1 appearance in membrane region. B) Lysosome specific LysoTracker dye (red), mitochondria specific MitoTracker dye (red) staining of BPAEC is shown. Flotillin-1 was stained with anti-flotillin-1 specific antibody (green) and DAPI (blue) was used to visualize nuclei. Scale bar: 50μm.

Additional Fig.3

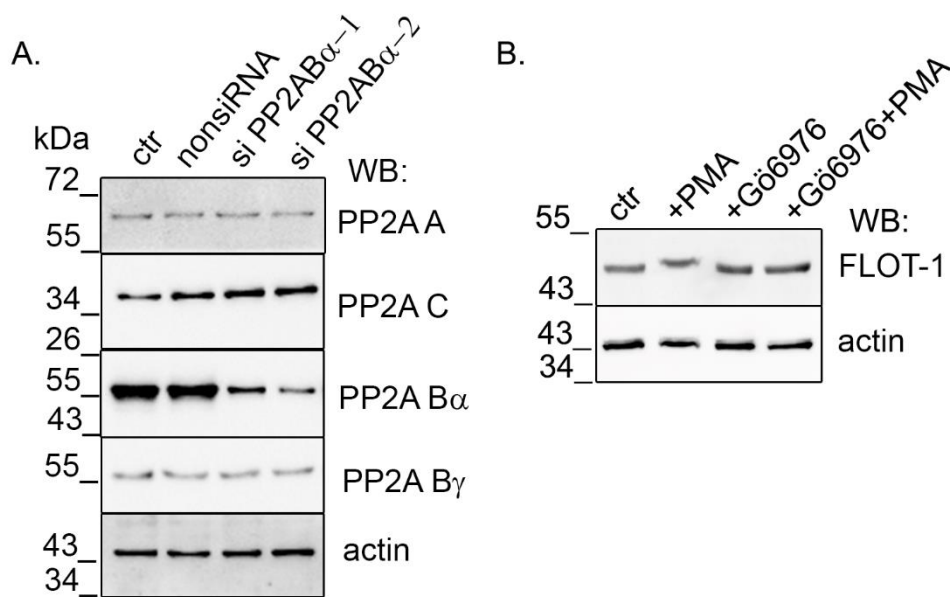

**Additional figure 3. Efficiency of PP2A B $\alpha$  silencing.** A) Control, non siRNA and PP2A B $\alpha$  specific siRNA transfected BPAEC cells were studied by Western blot using anti-PP2A A, anti-PP2A C, anti-PP2A B $\alpha$ , anti-PP2A B $\gamma$  and actin specific antibodies. B) BPAEC cells were treated with PMA, Gö6976 and PMA after addition of Gö6976. Proteins were resolved on 9% SDS-PAGE using 60V to detect mobility shift of flotillin-1. Samples were analysed by Western blot using flotillin-1 and actin antibody. Flotillin-1 molecular weight was calculated using Image Lab software.

Additional Fig. 4.

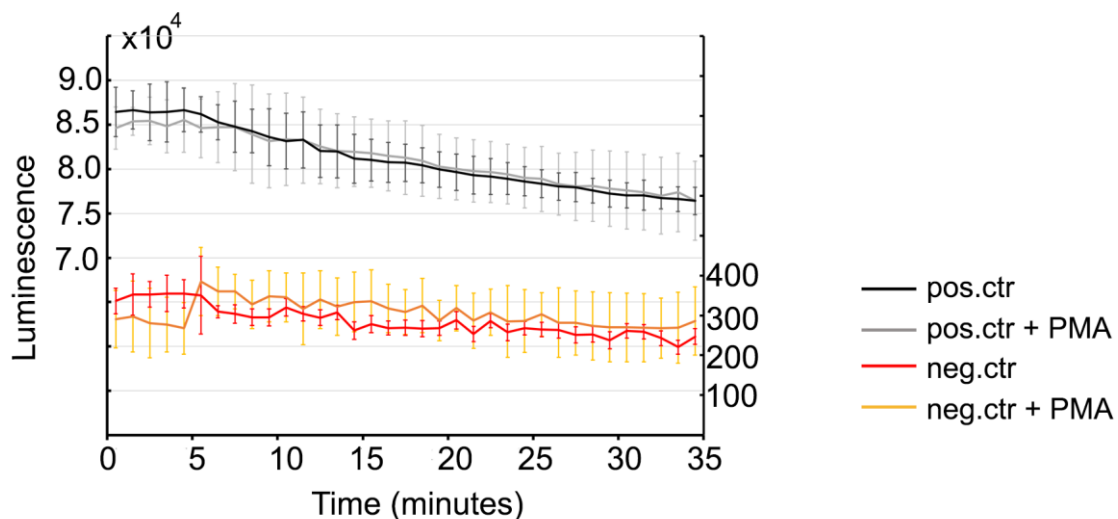

**Additional figure 4. Controls of NanoBiT luciferase complementation assay.** BPAEC cells co-transfected with SmBiT-PRKACA and LgBiT-PRKAR2A were used as positive control. Negative control vectors SmBiT-Halotag and LgBiT-PP2A B $\alpha$  were also used.

**Graphical abstract**

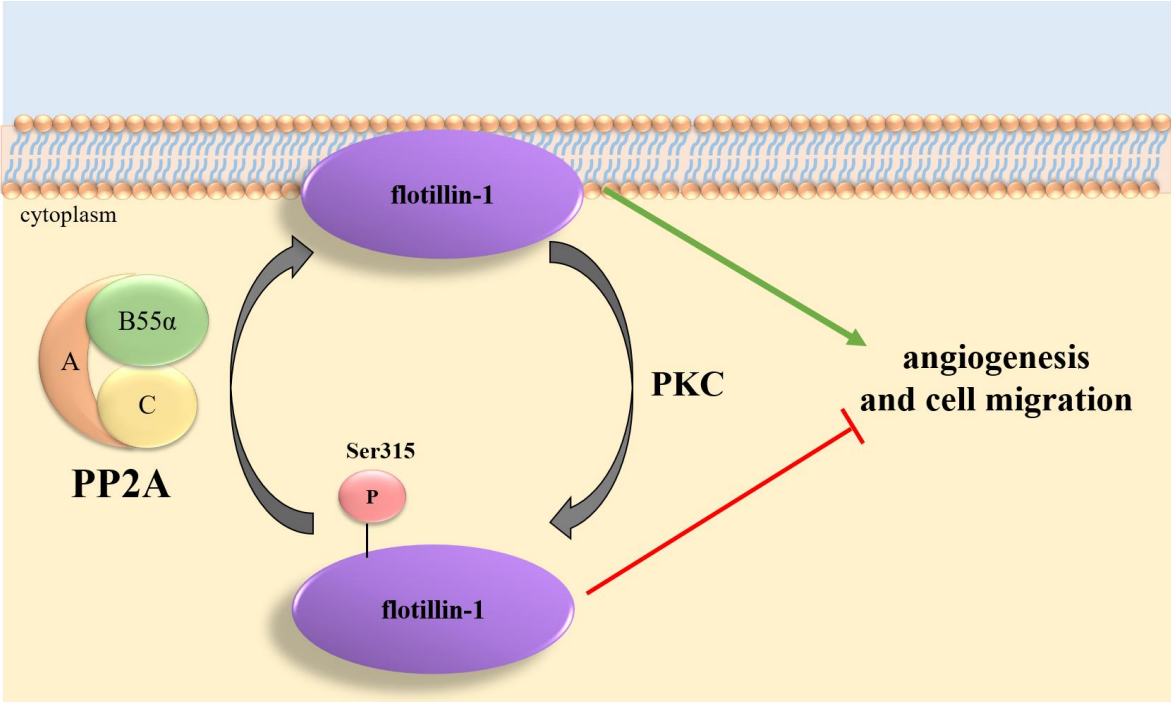

Supplement: supp_RA119.007980_143696_2_supp_432499_q1bqdq.pdf [file supp_RA119.007980_143696_2_supp_432499_q1bqdq.pdf]
